# Supplementary material
Source: PubMed Central journal article supplement (PMC1852256)
Supplement: blood_blood-2006-08-043570_2.pdf [file blood_blood-2006-08-043570_2.pdf]

| Sample | Leukemia subtype         | Sex | Age (years) | WBC count (cells/ $\mu$ L) | Blast cell count (%) | Cell Source                 |
|--------|--------------------------|-----|-------------|----------------------------|----------------------|-----------------------------|
| 1      | Pre-B cell ALL           | F   | 18          | $132 \times 10^3$          | 91%                  | Peripheral blood            |
| 2      | T-cell precursor ALL     | M   | 14          | $225 \times 10^3$          | 95%                  | Peripheral blood            |
| 3      | Pre-B cell ALL, relapsed | M   | 15          | $5 \times 10^3$            | 81%                  | Peripheral blood            |
| 4      | Pre-B cell ALL           | M   | 14          | $114 \times 10^3$          | 95%                  | Peripheral blood            |
| 5      | T-cell precursor ALL     | F   | 13          | $58 \times 10^3$           | 89%                  | Peripheral blood            |
| 6      | T-cell precursor ALL     | F   | 12          | $143 \times 10^3$          | 91%                  | Peripheral blood            |
| 7      | M5 AML                   | M   | 65          | $52 \times 10^3$           | 95%                  | Peripheral blood            |
| 8      | M5 AML                   | F   | 58          | $92 \times 10^3$           | 90%                  | Peripheral blood            |
| 9      | M2 AML                   | M   | 78          | $22 \times 10^3$           | 82%                  | Peripheral blood            |
| 10     | M4 AML                   | M   | 76          | $127 \times 10^3$          | >90% (marrow)        | Bone marrow (cryopreserved) |
| 11     | M5b AML                  | M   | 8           | $104 \times 10^3$          | >90% (marrow)        | Bone marrow (cryopreserved) |
